# Supplementary material for: Mannose Receptor C type 2 influences autoimmune neuroinflammation and blood-brain barrier integrity
Source: Research Square preprint supplement (doi:10.21203/rs.3.rs-6917781/v1), 2025-07-07
Supplement: Supplementary file 1 [file 3b14e754c8907520fdc8e08f.xlsx]

## Sheet: Sheet1
Acc	Symbol	Proteins	Score	Peps	Th17 EH MCAM-	Th17 NA MCAM-	Th17 EH MCAM+	Th17 NA MCAM+	Average (MCAM+/MCAM-)	Manually verified in raw data
P43121	MCAM	Cell surface glycoprotein MUC18	57	1	2.7	6.2	100	68.7	18.9741	Yes
P36980	CFHR2	Complement factor H-related protein 2	76	1	3.8	10.6	100	1.3	7.04036
Q9GZX6	IL22	Interleukin-22	39	1	17.2	4.9	100	22.1	5.5319	Yes
Q8IY17	PNPLA6	Neuropathy target esterase	48	1	0	24.5	25.4	100	5.12845
Q9UBG0	MRC2	C-type mannose receptor 2	53	2	23.4	12.5	70.4	100	4.73376	Yes
Q7Z4F1	LRP10	Low-density lipoprotein receptor-related protein 10	55	2	16	14.4	100	18.8	3.91893
Q15262	PTPRK	Receptor-type tyrosine-protein phosphatase kappa	59	1	21.2	32.2	100	92.6	3.60867
Q96PD4	IL17F	Interleukin-17F	77	2	28.1	6.7	100	17.4	3.36738	Yes
P17948	FLT1	Vascular endothelial growth factor receptor 1	43	1	0	30.3	0	100	3.29497
P21589	NT5E	5'-nucleotidase	63	2	28.8	29.4	86.9	100	3.21262	Yes
P42224	STAT1	Signal transducer and activator of transcription 1-alpha/beta	58	1	19.5	22.2	100	29.3	3.10821	Yes
Q8N8Z6	DCBLD1	Discoidin. CUB and LCCL domain-containing protein 1	36	1	26.4	26.8	100	53.1	2.88053
P14778	IL1R1	Interleukin-1 receptor type 1	39	1	21.2	39.2	100	71.1	2.83422	Yes
O14931	NCR3	Natural cytotoxicity triggering receptor 3	70	1	45.1	0	100	21.7	2.69666
Q93086	P2RX5	P2X purinoceptor 5	36	1	32.8	38.1	100	90.6	2.68945
P09668	CTSH	Pro-cathepsin H	40	3	31.3	38.4	83.3	100	2.62864	Yes
O95857	TSPAN13	Tetraspanin-13	83	1	19.8	29.8	25.9	100	2.54102
P27487	DPP4	Dipeptidyl peptidase 4	97	6	39.5	17.4	100	40.5	2.46536	Yes
Q8N697	SLC15A4	Solute carrier family 15 member 4	81	1	16.8	59.1	81.8	100	2.39483
P56199	ITGA1	Integrin alpha-1	82	7	43.1	17	100	43.4	2.38628	Yes
Q13586	STIM1	Stromal interaction molecule 1	126	1	57.8	13.4	100	66.7	2.34149
O00478	BTN3A3	Butyrophilin subfamily 3 member A3	43	1	0	58.9	32.6	100	2.25187
Q15004	PAF	PCNA-associated factor	135	1	73.2	10.2	100	86.9	2.24185
P25116	F2R	Proteinase-activated receptor 1	45	1	46.5	27.9	100	62.6	2.18653
P49961	ENTPD1	Ectonucleoside triphosphate diphosphohydrolase 1	74	5	46.2	7.5	100	16.2	2.1602	Yes
P01589	IL2RA	Interleukin-2 receptor subunit alpha	116	1	34.6	43.2	67.2	100	2.15016
P55011	SLC12A2	Solute carrier family 12 member 2	134	1	51	40.9	100	93.5	2.10549
P04066	FUCA1	Tissue alpha-L-fucosidase	89	1	56.7	19.4	100	58.7	2.08475
P19440	GGT1	Gamma-glutamyltranspeptidase 1	94	1	49.3	42.8	100	91.9	2.08408
Q8NC42	RNF149	E3 ubiquitin-protein ligase RNF149	70	1	65.5	27.4	100	86.2	2.00288
Q15043	SLC39A14	Zinc transporter ZIP14	50	2	33.8	25.9	100	19.3	1.99747
Q99808	SLC29A1	Equilibrative nucleoside transporter 1	124	1	51.2	36.1	100	73.5	1.98779
Q9UKY4	POMT2	Protein O-mannosyl-transferase 2	39	1	42.5	31.2	100	45.9	1.97975
Q9Y6M7	SLC4A7	Sodium bicarbonate cotransporter 3	40	2	46.6	43	100	74.6	1.9489
O43567	RNF13	E3 ubiquitin-protein ligase RNF13	67	2	39.5	32.3	38.3	100	1.92827
P06280	GLA	Alpha-galactosidase A	57	1	55.4	31.8	100	66.7	1.91125
P04035	HMGCR	3-hydroxy-3-methylglutaryl-coenzyme A reductase	69	1	47.2	27.4	100	42.1	1.90442
P10747	CD28	T-cell-specific surface glycoprotein CD28	130	3	45.4	38.8	100	60.2	1.90306
Q04721	NOTCH2	Neurogenic locus notch homolog protein 2	43	1	55.9	43.6	89.1	100	1.90018
P11166	SLC2A1	Solute carrier family 2. facilitated glucose transporter member 1	104	1	56.3	35.5	100	73.9	1.89436
P32970	CD70	CD70 antigen	97	2	38.9	45.8	58.9	100	1.87699
P46087	NOP2	Putative ribosomal RNA methyltransferase NOP2	99	1	42.7	27.4	100	29.7	1.8504
Q86VZ1	P2RY8	P2Y purinoceptor 8	64	1	67.5	7.6	100	38	1.83788
Q68CR1	SEL1L3	Protein sel-1 homolog 3	53	1	60.7	46.3	100	94.6	1.81934
P52849	NDST2	Bifunctional heparan sulfate N-deacetylase/N-sulfotransferase 2	63	1	0	97.6	100	76.3	1.80766
Q92859	NEO1	Neogenin	103	4	37.8	39.7	100	36.9	1.76533
P09564	CD7	T-cell antigen CD7	122	2	64.3	41.8	84.9	100	1.74274
P28907	CD38	ADP-ribosyl cyclase 1	97	3	65.5	45.6	100	91.6	1.72514
P05090	APOD	Apolipoprotein D	107	4	54.7	44.9	71.5	100	1.72231
P28908	TNFRSF8	Tumor necrosis factor receptor superfamily member 8	47	1	67.1	39.9	100	83.6	1.71655
P08195	SLC3A2	4F2 cell-surface antigen heavy chain	107	3	67.3	48.8	94.5	100	1.67481
Q96AQ6	PBXIP1	Pre-B-cell leukemia transcription factor-interacting protein 1	107	1	69.1	34.7	100	72.6	1.66275
Q14112	NID2	Nidogen-2	65	1	20.6	90.1	100	79.5	1.62007
P50897	PPT1	Palmitoyl-protein thioesterase 1	118	4	47.3	38	100	37.2	1.60908
P25445	FAS	Tumor necrosis factor receptor superfamily member 6	102	1	49.3	60.4	100	72	1.56833
Q8NBJ4	GOLM1	Golgi membrane protein 1	57	1	82.8	31.7	100	76.5	1.54118
Q11130	FUT7	Alpha-(1.3)-fucosyltransferase	64	1	48.8	56.4	100	55.2	1.47484
Q32P28	LEPRE1	Prolyl 3-hydroxylase 1	98	2	46	53	100	44.1	1.45509
P50402	EMD	Emerin	44	1	40.5	54.3	100	35.6	1.4299
P30481	HLA-B	HLA class I histocompatibility antigen. B-44 alpha chain	84	1	0.3	75	1.8	100	1.35213
Q99523	SORT1	Sortilin	88	2	100	20.6	87.6	71.5	1.31993
P11169	SLC2A3	Solute carrier family 2. facilitated glucose transporter member 3	50	1	46.2	65.2	100	44.8	1.3
P01892	HLA-A	HLA class I histocompatibility antigen. A-2 alpha chain	86	2	100	22.9	74	66.8	1.14588
Q9BY67	CADM1	Cell adhesion molecule 1	83	2	100	15.2	71	58.8	1.12643
P13746	HLA-A	HLA class I histocompatibility antigen. A-11 alpha chain	106	1	0.2	94.7	0	100	1.05342
Q9H3W5	LRRN3	Leucine-rich repeat neuronal protein 3	45	1	32.3	69.9	100	0	0.978051
P30483	HLA-B	HLA class I histocompatibility antigen. B-45 alpha chain	82	3	100	0.6	96.1	0.3	0.957428
Q9NR97	TLR8	Toll-like receptor 8	99	5	91.1	44.2	24.2	100	0.917883
P08603	CFH	Complement factor H	83	1	69.3	81.7	100	33	0.880506
Q30154	HLA-DRB5	HLA class II histocompatibility antigen. DR beta 5 chain	116	1	23.1	100	2.3	100	0.830755
A6NKC4	FCGR1C	Putative high affinity immunoglobulin gamma Fc receptor IC	73	1	43.8	99.9	17.9	100	0.819994
Q9NXL6	SIDT1	SID1 transmembrane family member 1	91	1	0	100	31.2	49.7	0.808276
Q5QGZ9	CLEC12A	C-type lectin domain family 12 member A	61	2	60.5	100	87	37.4	0.774753
Q9H497	TOR3A	Torsin-3A	106	1	100	57.2	35.8	86	0.774722
Q07011	TNFRSF9	Tumor necrosis factor receptor superfamily member 9	60	3	100	62.5	46.7	72.9	0.736208
P04196	HRG	Histidine-rich glycoprotein	118	1	52	100	66.9	44.6	0.73377
P79483	HLA-DRB3	HLA class II histocompatibility antigen. DR beta 3 chain	63	1	100	24.9	39.2	49.5	0.710483
P01579	IFNG	Interferon gamma	96	3	100	67.1	48.6	70	0.70984
P08246	ELANE	Neutrophil elastase	47	1	100	33.9	31.6	61.6	0.696545
P14222	PRF1	Perforin-1	85	1	100	25.5	49.4	37	0.688028
Q14697	GANAB	Neutral alpha-glucosidase AB	85	1	78.2	100	34.7	87.1	0.683653
P38570	ITGAE	Integrin alpha-E	79	3	100	73.8	24.3	90.2	0.658763
Q16563	SYPL1	Synaptophysin-like protein 1	93	2	96.5	100	79.2	48.9	0.652012
Q01151	CD83	CD83 antigen	87	3	67.4	100	30.5	78.1	0.648912
Q6P4A8	PLBD1	Phospholipase B-like 1	101	3	63.7	100	29.8	76.4	0.648669
P20160	AZU1	Azurocidin	46	1	100	35.7	27.8	59.8	0.64582
Q9NZ08	ERAP1	Endoplasmic reticulum aminopeptidase 1	105	1	97.1	62.2	100	0	0.627746
Q9UKJ1	PILRA	Paired immunoglobulin-like type 2 receptor alpha	76	1	40.4	100	11.3	75.7	0.619919
P24071	FCAR	Immunoglobulin alpha Fc receptor	41	1	25.6	100	9.8	67.5	0.615277
P11047	LAMC1	Laminin subunit gamma-1	89	1	46.5	100	41.9	48.1	0.614234
Q13308	PTK7	Inactive tyrosine-protein kinase 7	46	1	100	46.7	45	44.5	0.610551
P48509	CD151	CD151 antigen	47	1	85.1	100	65.2	44.4	0.5918
P02787	TF	Serotransferrin	108	1	88.6	100	42.7	63.8	0.564586
P42892	ECE1	Endothelin-converting enzyme 1	128	5	79.1	100	37.5	63	0.561285
O95866	G6B	Protein G6b	62	1	19.5	100	45.9	18.8	0.541845
P11215	ITGAM	Integrin alpha-M	72	6	54.2	100	22.2	61	0.539657
Q9P126	CLEC1B	C-type lectin domain family 1 member B	47	2	36.8	100	33.4	39.2	0.530364
Q9H3S1	SEMA4A	Semaphorin-4A	111	2	100	46.4	38.7	37	0.516975
P26718	KLRK1	NKG2-D type II integral membrane protein	95	1	100	19.7	32.5	29.1	0.514296
P04839	CYBB	Cytochrome b-245 heavy chain	101	3	39.7	100	12.1	59.1	0.509822
Q9UNW1	MINPP1	Multiple inositol polyphosphate phosphatase 1	73	1	100	93.7	51.2	46.8	0.505849
P02675	FGB	Fibrinogen beta chain	97	2	61.3	100	37.3	43.1	0.498223
Q9C0H2	TTYH3	Protein tweety homolog 3	99	3	50.7	100	28.2	45.9	0.492105
P01033	TIMP1	Metalloproteinase inhibitor 1	98	3	44.7	100	38.7	32.1	0.489357
Q9NNX6	CD209	CD209 antigen	49	1	71.6	100	26.7	56.7	0.485675
P04156	PRNP	Major prion protein	58	2	22.4	100	35.3	24.1	0.485007
Q96DU3	SLAMF6	SLAM family member 6	76	1	73.1	100	47.5	35.5	0.479058
P27701	CD82	CD82 antigen	65	3	81.2	100	39.6	46.6	0.475863	Yes
P06756	ITGAV	Integrin alpha-V	99	2	49.8	100	30.8	40.5	0.475602
P56202	CTSW	Cathepsin W	48	1	100	52.6	41.5	30	0.468314
P34810	CD68	Macrosialin	82	1	91.8	100	25.1	64.4	0.466727
Q14956	GPNMB	Transmembrane glycoprotein NMB	85	2	46.9	100	14.1	54.1	0.464769
Q6ZMG9	CERS6	Ceramide synthase 6	69	1	79.4	100	43.5	39.3	0.461501
P55899	FCGRT	IgG receptor FcRn large subunit p51	126	1	66.8	100	24.9	48.9	0.442437	Yes
P78324	SIRPA	Tyrosine-protein phosphatase non-receptor type substrate 1	72	3	62.8	100	25.3	46.5	0.44164	Yes
P01137	TGFB1	Transforming growth factor beta-1	82	3	46.4	100	26.9	37.3	0.438394
Q9UQV4	LAMP3	Lysosome-associated membrane glycoprotein 3	103	4	83.3	100	26.5	53.8	0.437968
P23229	ITGA6	Integrin alpha-6	109	6	56.5	100	35.5	30.9	0.424786
P05026	ATP1B1	Sodium/potassium-transporting ATPase subunit beta-1	79	2	47.7	100	19.1	43.3	0.422338	Yes
Q9Y6C2	EMILIN1	EMILIN-1	88	2	25.8	100	27.8	23.5	0.407678
P17301	ITGA2	Integrin alpha-2	116	1	34.1	100	15.8	37.3	0.395908	Yes
P15144	ANPEP	Aminopeptidase N	81	4	55.4	100	15.2	45	0.387287	Yes
Q9H7M9	C10ORF54	Platelet receptor Gi24	83	2	49.8	100	18.6	38.9	0.384119	Yes
Q6PI73	LILRA6	Leukocyte immunoglobulin-like receptor subfamily A member 6	54	1	46.8	100	35.2	20.8	0.381299
Q9NQ25	SLAMF7	SLAM family member 7	106	1	100	47	24.8	30.7	0.377146
Q6UWN5	LYPD5	Ly6/PLAUR domain-containing protein 5	40	1	92.4	100	0	72.4	0.376195
P28845	HSD11B1	Corticosteroid 11-beta-dehydrogenase isozyme 1	112	1	100	86.8	24.8	45.3	0.374881
Q96AP7	ESAM	Endothelial cell-selective adhesion molecule	101	2	94	100	2	69.9	0.37012
P40189	IL6ST	Interleukin-6 receptor subunit beta	92	1	68.2	100	30.8	31	0.36709	Yes
P25942	CD40	Tumor necrosis factor receptor superfamily member 5	122	1	49.9	100	11	42.6	0.356961	Yes
P20718	GZMH	Granzyme H	96	3	92.9	100	29.9	38.3	0.353529	Yes
P50454	SERPINH1	Serpin H1	65	1	17.7	100	20.4	19.8	0.341702
P32302	CXCR5	C-X-C chemokine receptor type 5	52	1	100	0	0	34	0.33986
P01859	IGHG2	Ig gamma-2 chain C region	41	1	8.1	100	8.8	27.5	0.336155
Q8NE01	CNNM3	Metal transporter CNNM3	76	2	53.9	100	30.3	20.4	0.329269
Q9NXH8	C9ORF167	Torsin family protein C9orf167	55	1	64.6	100	0	51.7	0.31396
P12259	F5	Coagulation factor V	103	7	46.3	100	16.8	26.8	0.298178	Yes
Q14766	LTBP1	Latent-transforming growth factor beta-binding protein 1	104	4	29.9	100	13.5	24.5	0.29186	Yes
P05155	SERPING1	Plasma protease C1 inhibitor	83	1	87.4	100	11.9	42.2	0.28897	Yes
Q9H0X4	ITFG3	Protein ITFG3	82	1	57.6	100	19.6	25.8	0.288054	Yes
Q9Y251	HPSE	Heparanase	105	5	44.1	100	20.2	20.7	0.283945	Yes
Q6PIU2	NCEH1	Neutral cholesterol ester hydrolase 1	79	2	67.4	100	25.1	21.4	0.277857	Yes
P15509	CSF2RA	Granulocyte-macrophage colony-stimulating factor receptor subunit alpha	51	3	68.4	100	28.6	18	0.276663
O14786	NRP1	Neuropilin-1	38	1	31	100	0	36.1	0.275369	Yes
O95976	IGSF6	Immunoglobulin superfamily member 6	95	1	46.9	100	4.9	35.3	0.27404	Yes
P10909	CLU	Clusterin	63	3	45.1	100	15.6	23.6	0.270187	Yes
Q6UWL2	SUSD1	Sushi domain-containing protein 1	64	2	44.3	100	16.6	17.4	0.235619
P09486	SPARC	SPARC	57	1	34.8	100	9.7	21.8	0.233508	Yes
P01857	IGHG1	Ig gamma-1 chain C region	40	2	100	91.7	12.3	32.4	0.233392	Yes
Q13201	MMRN1	Multimerin-1	132	17	45.2	100	10.1	23.3	0.229932	Yes
P16671	CD36	Platelet glycoprotein 4	117	5	80.1	100	13	26.1	0.217431	Yes
P13727	PRG2	Bone marrow proteoglycan	42	1	100	27.4	27.1	0	0.212982	Yes
P16284	PECAM1	Platelet endothelial cell adhesion molecule	98	6	48.3	100	8.9	21.5	0.205197	Yes
Q6PKC3	TXNDC11	Thioredoxin domain-containing protein 11	48	1	9.7	100	10.8	11.3	0.201437
P15018	LIF	Leukemia inhibitory factor	54	1	100	35.7	27.2	0	0.200344
Q9Y5Y4	GPR44	Putative G-protein coupled receptor 44	38	1	100	51.6	29.1	0	0.191779
P05106	ITGB3	Integrin beta-3	98	5	53.6	100	6.8	20.5	0.177893	Yes
Q6UX71	PLXDC2	Plexin domain-containing protein 2	71	1	34.5	100	9.7	14	0.175996	Yes
P07996	THBS1	Thrombospondin-1	143	6	31.8	100	5.2	17.6	0.173319	Yes
P02751	FN1	Fibronectin	95	5	37.5	100	6.9	16.2	0.168409	Yes
P01871	IGHM	Ig mu chain C region	54	1	100	94.9	6.5	25.1	0.162324	Yes
P40197	GP5	Platelet glycoprotein V	72	1	38.3	100	0	19.3	0.13934	Yes
Q9BX67	JAM3	Junctional adhesion molecule C	41	1	46	100	0	18.8	0.128964	Yes
P32927	CSF2RB	Cytokine receptor common subunit beta	47	1	100	52.7	0	19.2	0.125739
Q5SQ64	LY6G6F	Lymphocyte antigen 6 complex locus protein G6f	99	2	35.1	100	2.3	12.6	0.110012	Yes
P04275	VWF	von Willebrand factor	97	3	45.9	100	3.2	12.6	0.108094	Yes
P16109	SELP	P-selectin	49	3	58.6	100	5.7	10.7	0.103363	Yes
P51575	P2RX1	P2X purinoceptor 1	36	1	25.6	100	0	11.5	0.0913192	Yes
P02679	FGG	Fibrinogen gamma chain	95	2	60.1	100	4.5	6.9	0.0715774	Yes
Q9BT09	CNPY3	Protein canopy homolog 3	96	1	64.8	100	3.6	7	0.0641786	Yes
Q9Y624	F11R	Junctional adhesion molecule A	110	1	45.4	100	3.4	4.3	0.0524683	Yes
P35225	IL13	Interleukin-13	66	1	0	100	0	0	0.01	Yes
P23219	PTGS1	Prostaglandin G/H synthase 1	66	1	0	100	0	0	0.01
P04229	HLA-DRB1	HLA class II histocompatibility antigen. DRB1-1 beta chain	45	1	57.3	100	0	0	0.01
P43119	PTGIR	Prostacyclin receptor	38	1	36.1	100	0	0	0.01
Q9NYU2	UGGT1	UDP-glucose:glycoprotein glucosyltransferase 1	66	1	100	74.9	0	0	0.01
Q9Y274	ST3GAL6	Type 2 lactosamine alpha-2.3-sialyltransferase	51	1	23.6	100	0	0	0.01
Q14392	LRRC32	Leucine-rich repeat-containing protein 32	59	1	29.4	100	0	0	0.01	Yes
