# Supplementary material for: Mannose Receptor C type 2 influences autoimmune neuroinflammation and blood-brain barrier integrity
Source: Research Square preprint supplement (doi:10.21203/rs.3.rs-6917781/v1), 2025-07-07
Supplement: Supplementary file 2 [file d2bf6bbe195a17b3fc8f1e70.docx]

**Supplementary Materials for**

Mannose Receptor C Type 2 Influences Neuroinflammation and Blood–Brain Barrier Integrity

Bettina Zierfuss *et al.*

Corresponding author: Alexandre Prat, a.prat@umontreal.ca

**This file includes:**

Materials and Methods

Table S1-S2

References34-51

**Materials and Methods**

**Isolation of PBMCs, CSF, and blood-derived T lymphocytes**

Informed consent in accordance with institutional guidelines of the Centre Hospitalier de l’Université de Montréal (CHUM) research ethic committee with the approval number BH07.001, 20.332 and 23.100 was obtained and venous peripheral blood was collected in EDTA-coated tubes, as well as cerebrospinal fluid (CSF) from spinal taps were analyzed. PBMC isolation was performed as described previously9,10. Donor information of PBMCs used for flow cytometry is summarized in extended table 1. In addition, donor information of blood / cerebrospinal fluid (CSF) samples used for flow cytometry are shown in extended table 4. EasySep™Human cell selection kits (Stemcell™Technologies) and MACS® Cell Separation Kits (Miltenyi Biotec) (EasySep Human CD8 Positive Selection Kit II, Cat.no.: 17853; CD4+ negative selection Kit, Cat.no: 19052; Naive CD4+T Cell Isolation Kit II, Cat.no.: 130-094-131) were used according to the manufacturer’s instructions to isolate and enrich for CD4+T lymphocytes, memory CD45RO+CD4+T lymphocytes, and CD8+T lymphocytes, respectively.

**Human T lymphocyte culture**

T lymphocytes were stimulated and polarized as described previously8,9,30. Briefly, T lymphocytes (1 x 106 cells/mL) were cultured for 5 days (CD45RO+CD4+T lymphocytes) or 6 days (CD8+T lymphocytes) in X-VIVO 15 medium (Lonza) supplemented with GlutaMax (1X, Thermo Fisher Scientific) and penicillin-streptomycin (100 U/mL and 100 µg/mL respectively, Thermo Fisher Scientific) on plate-bound anti-CD3 (final concentration 2.5 µg/mL clone OKT3, eBioscience) and with soluble anti-CD28 (2 µg/mL, CD28.2, BD Biosciences) antibodies. For further differentiation, T lymphocytes were cultured in the presence of the following cytokine / antibody cocktail: T helper (H) / cytotoxic (C) 17 mix: rh IL-23 (25 ng/mL, R&D Systems), anti-IL-4 antibody (5 µg/mL, clone 3007, R&D Systems, or clone 11B11, Bio X Cell) and anti-interferon (IFN)-γ antibody (5 µg/mL, clone K3.53, R&D Systems, or clone B133.5, Bio X Cell); TH/C2 mix: rh IL-4 (200 ng/mL, R&D Systems), anti-IFN-γ antibody (5 µg/mL) and anti-IL-12 p70 antibody (5 µg/mL, clone 24910, R&D Systems, or clone 20C2, Bio X Cell); or TH/C1 mix: rh IL-12 (10 ng/mL, R&D Systems) and anti-IL-4 antibody (5 µg/mL).

**Isolation and culture of primary human BECs from biopsied brain tissue**

Primary BECs were isolated from nonepileptic surgical human CNS material and cultured as described previously34-36. Informed consent was obtained prior to the surgeries in accordance with institutional guidelines (Centre Hospitalier de l’Université de Montréal (CHUM) research ethic committee approval number BH07.001, 20.332). To induce inflammation, confluent primary cultures were treated with rh tumor necrosis factor (TNF)-α (100 U/mL, Thermo Fisher Scientific) and rh IFN-γ (100 U/mL, Thermo Fisher Scientific) for 24 hours.

**Human brain specimens**

Human brain biopsies and autopsies were surgically collected from donors after obtaining informed consent and ethical approval (CHUM research ethic committee approval number BH07.001, 20.332). Tissue blocks were frozen in 2-methylbutane and cryosectioned (7μm thick) prior to staining. For this study, we analyzed frozen tissue blocks from six PwMS (33- and 51-years-old females with RRMS; 26-years-old male with RRMS; 61-years-old male with SPMS, and 44- and 60-years-old females with SPMS) and four controls (non-neurological disease and epilepsy controls; 31-, and 37-old female control; 42- and 67-years-old male controls) summarized in extended table 2. MS lesions were classified using Luxol Fast Blue/Haematoxylin & Eosin staining and Oil Red O staining as previously described 37. We additionally performed flow cytometry analysis on single cell suspension isolated from rapidly autopsied brain tissue (postmortem delay between 4 and 5 hours) from two male patients with progressive MS (PPMS, 56-years old, EDSS = 8; SPMS, 60-years old, EDSS = 7) and two patients with ALS, as non-MS neurological disease control (extended table 3) who underwent medical aid in dying as described below. Brain tissue from all patients were perfused prior organ donation as indicated.

All PwMS were classified as RRMS, SPMS, or PPMS at the time of sample collection according to McDonald’s 2017 revised criteria38. In our cohort of untreated patients, MS patients defined as relapsing experienced one or more relapses two months prior to blood collection. Progressive MS patients were selected and distinguished regarding sustained disability worsening (SDW) events. In this context disease progression was determined according to the change (Δ) expanded disability status scale (EDSS) experienced by the patient over the 5 years prior to blood collection. We considered disease progression when patients showed an ΔEDSS ≥ 1.5 increase with a baseline EDSS of zero, ΔEDSS ≥1.0 increase with a baseline EDSS of 1–5 and ΔEDSS ≥ 0.5 for patients with a baseline EDSS of 5.5 or higher as described previously2.

**Single cell isolation from autopsied human brain tissue**

To confirm lesion type, one third of the sample was frozen for lesion classification purposes as described above. The weight of the residual sample was recorded and further processed to obtain a single-cell suspension as described previously39. Tissue processing was performed by mincing the tissue using scalpels, followed by digestion in 3 mg / ml collagenase D (Roche, Cat.no.: 11088866001) and 14 µg / ml DNase I (Worthington, Cat.no.: LS002139) per gram brain tissue for 15 minutes, at 37°C, shaking. Samples were quenched in RPMI and 10% FBS and penicillin and streptavidin on ice. Samples were filtered consecutively through a 100 µm mesh (BD Biosciences, Cat.no.: 352360) and 70 µm mesh (BD Biosciences, Cat.No.: 352350) and using a pestle (Ultident, Cat.No.: 229480). To remove myelin debris, the tissue homogenate was applied to a 37% percoll (GE Healthcare, Cat.No.: 170-0891-01) gradient and was centrifuged at 15 minutes at 1500 rpm (485 g, acceleration 5, deceleration 1). The layer containing cells was harvested and washed in 1x HBSS. Finally, red blood cells were removed by the usage of the EasySep™ Red Blood Cell (RBC) Depletion Reagent kit (Stemcell, Cat.no.:18170) as described by the manufacturer’s instructions. Cell number was determined, and flow cytometry extracellular staining was performed as described above but with no fixation and cells were immediately acquired after staining.

**MRC2 KO Mice**

To generate MRC2 (alias UPARAP) KO mice, cryopreserved sperm from male C57BL/6J kindly donated from Dr. Thomas Bugge (NIH) was used for in house in vitro fertilization using oocytes from female C57BL/6NHsd mice. KO and their wildtype (WT) littermates were obtained from heterozygous breeding, crossbred with WT C57BL/6J obtained from Jackson laboratory, to maintain a stable colony and control for genetic background. The MRC2 KO is characterized by the replacement of exon 2 to exon 6 by a HPRT expression cassette and thus devoid of the fibronectin-II (FN-II) domain, C-type lectin-like domains (CTLD)1 and CTLD1-CTLD2 linker domain and has been thoroughly described previously. Genotypes were assessed by PCR using the following primers: uPARAP-E3_WT_Fw 5’-TCTACACCATCCAGGGAAACTCAC-3’, uPARAP-E4_WT_Rv 5’-TTAAACTGGTAACAGCTGTCAGTC-3’, and uPARAPtarg-Mut-Fw 5’-TCCTACAAATACACGCTGGCGATA-3’, HPRT-Mut-Rv 5’-GCAGTTCCCTTTTAAATGCAAATCA-3’ as described previously. PCR products were assessed by loading on a 2% agarose gel and by expected sizes for WT allele at 363 bps and targeted allele at 150 bps. MRC2 KO mice from this colony did not show any abnormal phenotype and were fertile. Mice were kept in a 12 hours light, 12 hours dark cycle.

**Experimental Autoimmune Encephalomyelitis (EAE)**

Active MOG35-55 EAE was induced in male and female 8- to 12-weeks-old C57BL/6 mice from the MRC2 KO colony and their WT littermates. The experiments were approved by the Animal Care Committee of the CR-CHUM in accordance with the guidelines of the Canadian Council on Animal Care (approval number N23048APs). Induction, scoring and pathology of EAE was performed as previously described8-10,30, unless otherwise indicated. Briefly, C57BL/6 mice were immunized subcutaneously with MOG35–55 (200 µg, MEVGWYRSPFSRVVHLYRNGK, Alpha Diagnostic) in a 100µl emulsion of incomplete Freund’s adjuvant (BD, Cat.no.: 263910) supplemented with Mycobacterium tuberculosis (4 mg/ml, BD, Cat.No.: 231141). Followed by intraperitoneally injection of Pertussis toxin (400 ng, List Labs) on day 2. Disease was monitored as follows: 0 = normal; 0.5 = partially limp tail; 1 = paralyzed tail; 2 = loss in coordinated movement, hindlimb paresis, ataxia; 2.5 = loss in coordinated movement, hind limb paresis, ataxia and weakness in hind limb, 3 = paralysis of one hindlimb (monoparalysis); 3.5 = one hind limb paralyzed and weakness in second hind limb, 4 = paralysis of both hindlimbs (paraparalysis); 4.5 = hind limbs paralyzed, weakness in forelimbs, 5 = moribund (or sacrifice) and described previously40. The presence of ataxia was monitored (head tilt, and / or edge walking) and increased the basal score by 0.5 increment. Clinical disease in mice was assessed by investigators blinded to the genotype groups. Finally, brains, spinal cords, spleens, and lymph nodes were surgically harvested after intracardiac perfusion with PBS from mice at peak disease (days 13 - 15) or chronic disease (days 37 - 41) to allow flow cytometry analysis and immunofluorescence microscopy as previously described10,30.

**Isolation and culture of primary murine microvascular BECs**

Murine BECs were isolated and cultured as described previously41-43. In short, brains from at least 10 WT C57BL/6 mice from the same sex and > 10-weeks-old were harvested. Brains were cut into three parts (right and left hemisphere, and cerebellum), followed by removal of the meninges by rolling on filter paper. The tissue was minced by scalpels, pooled and further homogenized using a 30 ml tissue homogenizer (PTFE/Low Extractable Borosilicate Glass, Wheaton). Tissue digestion was performed in a mix of 1.05 mg/ml collagenase Type II (Worthington, Cat.#: LS004176) and 58.5 U/ml DNase I (Worthington, Cat.#: LS002139) for 1 h 15 min at 37°C, shaking. Next, the cell pellet was resuspended in 20% BSA and centrifuged at 1,000 g for 20 min at 4°C, followed by the removal of the myelin debris layer. Digestion was then performed in 1 mg/ml Collagenase/Dispase + 39 U/ml DNase I for 1 h at 37°C, shaking. Cell suspension was applied to 33% continuous Percoll gradient and centrifuged at 1,000 g for 10 min at 4°C, acc 9, dec 5. The layer containing the microvessels was harvested and cells were seeded in Col IV-coated (BD Biosciences, Cat.#: 354233) T25 flasks in culture medium containing DMEM (Thermo Fisher Scientific, Cat.#: 11965-092), 20% FBS, 1 ng/ml bFGF (MilliporeSigma, Cat.#: F0291), 100 µg/ml Heparin (MilliporeSigma, Cat.#: H4784), Pen / Strep, 1.4 µM Hydrocortisone (MilliporeSigma Aldrich, H0396). Murine BECs were enriched by culturing in the presence of 10 µg/ml puromycin (MilliporeSigma, P8833) for 1 day, followed by the reduction of puromycin to 4 µg/ml on day 2. On day 3, medium was changed to culture medium without puromycin and BECs were cultured until confluency on day 7. BECs were gently detached by washing in pre-warmed PBS, followed by incubation in PBS and EDTA (f.c. 2 mM) for 5 minutes at 37°C, and 5 minutes at room temperature. Then, same volume of trypsin (1x) diluted in PBS EDTA was added and incubated for 2 to 4 minutes at room temperature until BECs were detached. Cells were quenched in culture medium, washed and counted. For flow adhesion assay, 60,000 cells per 100 µl culture medium per ibidi chamber (ibidi, cat.no.: 80176, µ-Slide I 0.4 Luer ibiTreat) were seeded. Culture medium was replenished every two days. Cells were cultured at 37°C, 5% CO2, for 7 days until confluency was reached.

**Isolation and polarization of primary murine splenocytes and T lymphocytes**

Splenocytes were harvested from C57BL/6 (MRC2 KO or WT littermates) in RPMI, GlutaMax (1X, Thermo Fisher Scientific), penicillin-streptomycin (100 U/mL and 100 µg/mL). Single cell suspensions were obtained by filtering spleens through a 70 µm mesh and by using a pestle. Cell suspensions were incubated in 0.83 % ammonium chloride for 4 minutes, at room temperature, shaking, to remove red blood cells. Cell solutions were quenched in RPMI, GlutaMax, Pen/Strep and centrifuged at 1200 rpm, 10 minutes, at room temperature. Cells were filtered through a 70 µm mesh, washed in culture medium, and counted.

To generate murine TH1/TH2 and TC1/TC2 lymphocytes, CD4+ and CD8+T lymphocytes were isolated from splenocytes using MACS Cell Separation kits (Miltenyi Biotec, CD4 (L3T4) microbeads mouse for positive selection, Cat.No. 130-117-043; CD8a (Ly-2) microbeads mouse for positive selection, Cat.: 130-117-044) as described previously44 and as suggested by the manufacturer. Cells were cultured for 4 to 5 days at 37°C, in RPMI-1640 (Wisent) supplemented with FBS (10%, MilliporeSigma), GlutaMax (1X, Thermo Fisher Scientific), penicillin-streptomycin (100 U/mL and 100 µg/mL respectively, Thermo Fisher Scientific), nonessential amino acids (1X, MilliporeSigma), sodium pyruvate (1 mM, Thermo Fisher Scientific), HEPES (0.01 M, Wisent) and β-mercaptoethanol (50 µM, MilliporeSigma), on plate-bound anti-CD3 (10 µg/mL incubated for 2-3 hours at 37°C, clone 145-2C11, Bio X Cell, Cat.no.: BE0001-1) in presence of anti-CD28 (2 µg/mL, clone 37.51, BD Biosciences, Cat.no.: 553294) referred to as unpolarized cells. To further differentiate cells, T lymphocytes were cultured in presence of either a TH/C1 (IL-12-dependent) cocktail: anti-IL-4 antibody (20 µg/ml, Clone 11B11, BioXcell, Cat.No.: BE0045), rm IL-12 (10 ng/ml, R&D, Cat.No.: 419-ML) or a TH/C2 (IL-23-dependent) cocktail: Anti-IL-12 antibody (20µg/ml, BioXCell, Clone R1-5D9, Cat.No.: BE0052), rm-IL-4 (10 ng/ml, R&D, Cat.No.: 404-ML). Cytokine/antibody cocktails were replenished on day 2.

**Flow cytometry**

Extracellular and intracellular staining was performed as previously described 9,10,39. Briefly, Fc receptors were blocked by incubating human and mouse cells with mouse, rat and/or rabbit serum (final concentration 2.5%- 5%) in FACS buffer (1x PBS, 1% FBS (Thermo Fisher Scientific), 0.1 %NaN3 (MilliporeSigma)), respectively, for 20 minutes at 4°C. Cells were subsequently incubated with LIVE/DEAD fixable Aqua dead cell stain kit (Thermo Fisher Scientific) as per manufacturer’s instructions, and surface antigen targeting antibodies for 30 minutes at 4°C. After staining for surface antigens, cells were fixed and permeabilized using BD Cytofix/Cytoperm (BD Biosciences) per manufacturer’s instructions and incubated with cytokine targeting antibodies for 30 minutes at 4°C. For intracellular transcription factor staining, the eBioscience™ Foxp3/Transcription Factor Staining Buffer Set was used instead and as described in the manufacturer’s manual. For activation, cells were stimulated with 1μg/mL ionomycin (MilliporeSigma) and 20 ng/mL phorbol 12-myristate 13-acetate (PMA, MilliporeSigma) in the presence of protein transport inhibitor, BD GolgiPlug™ containing brefeldin A, for 4 hours at 37°C, 5% CO2. Cells were acquired on the BD FORTESSA cytometer (BD Biosciences) and cell analysis was performed using BD FACSDiva software (BD Biosciences) and FlowJo software (FlowJo, LLC). Cells were gated for single cells, live cells, and positive gates were defined using isotype and/or fluorescence minus one (FMO) control. Antibodies used for human cells are shown in table S1 and for murine cells in table S2.

**RNA isolation and real time-quantitative polymerase chain reaction (RT-qPCR)**

RNA isolation (using Trizol, Cat.no.: 5596018, Invitrogen, and RNAeasy Mini kit, Cat.no.: 74106, Qiagen) and real time quantitative PCR were conducted on human BECs as previously published10. For cDNA synthesis, Quantitect Reverse Transcription kit (Cat.Mo.: 205313, Qiagen) was used. Relative gene expression was determined using TaqMan fluorescein amidites-labeled probes for Collagen Type IV Alpha 1 Chain (COL4A1, HS00266237_m1), Collagen Type IV Alpha 2 Chain (COL4A2, HS05006309_1), Intercellular Adhesion Molecule 1 (ICAM1, HS00164932_m1), Glyceraldehyde-3-Phosphate Dehydrogenase (GAPDH, HS99999905_m1)(Thermo Fisher Scientific) and Taqman™ Real-Time PCR - Taqman™ Master Mix (Cat.No.: 4324020, Thermo Fisher Scientific). For each reaction, 35 ng cDNA was used and performed in replicates. Quantitative PCR was performed in a QuantStudio 7 Flex real-time PCR system (Thermo Fisher Scientific). Standard curves were performed for each gene and relative gene expression was calculated using the 2-ΔΔCq method45,46 normalized to a reference RNA sample used in each experiment.

**Proteomics analysis**

Human memory CD4+CD45RO+T lymphocytes were harvested after 6 days in culture in serum-free medium under TH17-polarizing conditions. MCAM+ T lymphocytes and MCAM- T lymphocytes were purified using MACS beads as described previously8,9. Prior to protein extraction, cells were washed twice in PBS. Cell pellets were resuspended in denaturing buffer (50mM Tris-HCl, pH 8.5, 0.1% SDS) and the suspension sonicated in short 10-second bursts followed by 30-second intervals on ice for cooling, until obtention of a homogeneous sample. Debris was cleared by centrifugation (10,000g for 10 minutes at 4°C) and proteins concentrated with 10 volumes cold acetone for 1 hour at -20°C. After centrifugation (5000 xg for 10 minutes at 4°C), the supernatant was discarded and pellet stored at -80°C. Proteomics analysis was carried out by nanoflow liquid chromatography-tandem mass spectrometry as previously described10,34,47.

**Immunostaining procedures**

Polarized T lymphocytes were activated using Ionomycin and PMA as described above, washed in PBS followed by attachment of cells to objective slides in 25% glycerol by using cytospin. Slides were pre-fixed in ice-cold acetone for 20 seconds, dried overnight and stored at -80°C until immunocytostaining was carried out as previously described30,39.

For murine tissues, C57BL/6 mice immunized with MOG35-55 were euthanized at chronic disease (Day 40 to 41). Spinal cords and brains were surgically removed, frozen in optimal cutting temperature compound (OCT) and cryosectioned (7μm thick) for further staining procedures, as previously described10,30,48,49.

For immunohistostaining, frozen tissue sections were air dried, fixed in ice-cold acetone for 10 minutes, delipidated in 70% ethanol for 5 minutes, hydrated in PBS, and blocked with 10% species-specific serum (Thermo Fisher Scientific) of the secondary antibody host. If biotinylated primary antibodies were used, we additionally used the endogenous biotin – blocking kit (Invitrogen, Cat.No.: E21390) following manufacturer’s instructions. This was followed by an incubation with 3% species-specific serum containing primary antibodies overnight at 4°C. The next day, the slides were washed with PBS Tween-20 (0.05%, MilliporeSigma), incubated in PBS containing secondary antibodies for 1 hour at room temperature, washed again and mounted using Mowiol reagent containing TO-PRO-3 (1:300, Thermo Fisher Scientific), or sections were counterstained with 4',6-diamidino-2-phenylindole (DAPI, MilliporeSigma, 1:500) for 10 min at room temperature prior washing and mounting with Mowiol. Each experiment included negative controls (secondary antibodies only).

The following primary antibodies were used for human tissue: anti-MRC2 primary antibody (mouse anti-human / anti-mouse MRC2, Millipore, Cat. No.: MAB2613, 1:30; or rabbit anti-human MRC2, abcam, Cat.No.: ab70132, 1:30), rat anti-human CD8 primary antibody (abcam, Cat. No.: ab60076, 1:100), or mouse anti-human CD4-FITC antibody (BD Biosciences, Cat.No.: 555346, Clone RPA-T4, 1:50), or anti-Col IV antibody (rabbit anti-human Col IV, Millipore, Cat.No.: AB8201, 1:100; or goat anti-human Col IV, Millipore, AB769, 1:30). The following secondary antibodies were used for human tissue: donkey anti-mouse AF488, Invitrogen, Cat.No.: A21202, 1:400; donkey anti rabbit AF647, Jackson ImmunoResearch, Cat.: 711-605-152, 1:500; donkey anti-goat Cy3, Jackson ImmunoResearch, Cat.No.: 705-166-147, 1:400; donkey anti-rat AF488, Invitrogen, Cat.No.: A21208, 1:400; donkey anti-mouse Cy3, Jackson ImmunoResearch, Cat.No.: 715-166-150, 1:200; donkey anti rabbit AF647, Jackson ImmunoResearch , Cat.No.: 711-605-152, 1:500. We used the following primary antibodies for murine sections: Mouse anti-human / anti-mouse MRC2, Millipore, Cat. No.: MAB2613, 1:30; rat anti-mouse CD4-FITC, BD Biosciences, Cat.No.: 553046, Clone RM4-5, 1:70; rat anti-mouse CD8a (Ly2)-biotin, BD Biosciences, Cat.No.:553029, Clone 53-6.7, 1:100; rat-anti mouse CD45, BD Biosciences, Cat.No.: 553076, Clone 30-F11, 1: 70. The following secondary antibodies were used for murine tissue: Donkey anti-mouse AF647, Jackson ImmunoResearch, Cat.No.: 715-605-151, 1:400; anti-FITC AF488, Invitrogen, Cat.No.: A11090, 1:50; Streptavidin-AF488, Jackson ImmunoResearch, Cat.No.: 016-540-084, 1:500, donkey anti-rat AF488, Invitrogen, Cat.No.: A21208, 1:400. Images (z-stacks) were acquired using a Leica SP5 confocal microscope with Leica LAS AF software. Images were processed using Fiji and LAS X. All acquisition settings were kept the same within each experiment. For the analysis of CD45+cell infiltrates on murine CNS tissue, entire slides were scanned using the Olympus slide scanner microscope (VS110, BX61VSF) and the software Olympus Image Viewer was used for analysis.

**Transendothelial migration assay using primary human BECs**

We conducted these experiments as previously described 10. Briefly, in vitro differentiated human TH1 and TC1 cells were pre-treated with specific anti‐MRC2 blocking antibody, mAb 5f4 (produced at the laboratory of author NB 50,51) (50 µg/mL) or isotype antibody (50 µg/mL, Bio X Cell) for 1 hour, transferred to the top compartment of the Boyden chamber (BD Biosciences, Cat.No.: 353096, 3µm pore size, gelatine-coated transparent PET membrane) with a confluent monolayer of primary cultures of human BECs. Cells were co-cultured in BEC-specific cell culture medium (ECM3) supplemented with 40% astrocyte-conditioned medium (ACM). After 16 hours incubation at 37°C and 5% CO2, the migrated cells in the bottom compartment were collected and quantified using a hemocytometer. The average migrated cells of the replicates were calculated. In addition, BECs were gently detached as described for murine BECs, harvested cells per condition were pooled and extracellular surface staining for flow cytometry analysis was performed.

**Flow adhesion assay using primary murine BECs**

Experiments were conducted as previously described10,44 with the exception of using murine TH1 and TC1 polarized lymphocytes from MRC2 KO mice and WT littermates and primary cultures of murine BECs from WT mice. After seeding the CFSE-labelled T lymphocytes on Ibidi flow chambers with a confluent monolayer of murine BECs, pressure was applied using automatic switching valve option every 50 seconds. Videos were captured every 30 seconds, with the camera focus gradually shifting upstream in the flow direction, until a total of 30 minutes was recorded for each condition. Immune cell tracks and velocity were analyzed using the software Imaris. Immune cells which moved slower than 100 µm per second along BECs were defined as rolling cells.

**Col IV degradation assay**

To assess the capacity of Col IV uptake and degradation, uncoated ibidi-flow chambers (Ibidi, Cat.No.: 80601, 6-channel μ-Slide suitable for flow experiments and for immunofluorescence assays) were pre-coated with 30 µl DQ™ Collagen, type IV Fluorescein Conjugate (Cat.no.: D12052, Invitrogen, f.c. 25µg/ml) per well for 15 minutes, at 37°C, in the dark. The quencher close to the fluorescent dye allows detection of fluorescent signal only upon enzyme-specific hydrolases of the substrate. 1x105 Th1- and 1x105 Tc1-polarized T lymphocytes from MRC2 KO mice or WT littermates were seeded per well. This was followed either by live imaging and recording for 16 hours, every 30 minutes, or cells were incubated for 16 hours and fixated, counterstained with anti-CD3 antibody and DAPI and analyzed by confocal microscopy as described in “immunostaining procedures”. Negative controls (cells on non-fluorescent collagen IV-coated chambers) and positive controls (incubation with collagenase for 1 hour) were included to assess background fluorescence intensity. Positive T lymphocytes for Col IV degradation product (green fluorescent) were quantified using the maximum fluorescence intensity per cell normalized by cell size after 16 hours (in both the live imaging and the confocal microscopy experiments).

**Proliferation assay**

To determine proliferation ability, murine T lymphocytes from MRC2 KO mice and WT littermates were stained with CellTrace™ CFSE Cell Proliferation Kit, for flow cytometry (C34554, Invitrogen) as described by the manufacturer’s instructions. In short, 5x106 cell / ml were incubated with 5µM pre-warmed CFSE solution and incubated for 20 minutes, at 37°C, protected from light, followed by incubation in 5x volume culture medium. Cells were either directly counterstained and fixed for flow cytometry or first cultured for 5 days, in the dark at 37°C, 5% CO2 in presence of TH/C1- or TH/C2-polarization cocktail, followed by stimulation with 1μg/mL ionomycin (MilliporeSigma) and 20 ng/mL PMA (MilliporeSigma) in the presence of protein transport inhibitor, BD GolgiPlug™ containing brefeldin A, for 4 hours at 37°C, 5% CO2. Finally, all samples were counterstained with hamster anti-mouse CD3-BV786 (BD, 564379, 3µl per test), rat anti-mouse CD4-PE-Cy7 (BD, 552775, 0.5 µl per test), rat anti-mouse CD8a-PB (BD, 558106, 4µl per test) and LIVE/DEAD fixable Aqua dead cell stain kit. Samples were gated on singlets, live cells and CD3+CD4+ or CD3+CD8+T lymphocytes, and assessed regarding the replication rate (defined as the number of divided cells per cells which underwent division) of cells by analyzing the CFSE-fluorescence peaks and using the proliferation tool provided in FlowJo.

**Supplementary Tables**

**Table S1: Antibodies for flow cytometry – human samples**

| | Target | Fluorophore | Dilution or µl per reaction | Company | Catalog number | | --- | --- | --- | --- | --- | | - | AF700 | 0.2 | BD Biosciences | 557995 | | - | AF488 | 5 | Biolegend | 400625 | | - | PE-Dazzle-AF594 | 3 | Biolegend | 400952 | | - | APC | 5 | Invitrogen, eBioscience | 17-4714-82 | | - | PE-CF594 | 3 | BD Biosciences | 562292 | | - | BV650 | 1 | Biolegend | 400266 | | - | eF660 | 10 | ThermoFisher Scientific | 50-4714-82 | | - | PE | 2.5 | BD Biosciences | 340761 | | - | PE | 1.25 | Biorad | MCA1212 | | - | PE-Cy7 | 2.5 | BD Biosciences | 557647 | | - | PerCP Cy5.5 | 2.5 | Biolegend | 400532 | | - | PerCP Cy5.5 | 2-2.5 | BD Biosciences | 550927 | | - | FITC | 5 | BD Biosciences | 555748 | | anti-rabbit | AF488 | 1:400 dilution | Invitrogen | A21206 | | anti-mouse | AF488 | 1:400 dilution | Invitrogen | A21202 | | anti-rabbit | AF594 | 1:400 dilution | Invitrogen | A21207 | | CCR7 | PE | 5 | R&D systems | FAB197P | | CCR7 | BV650 | 5 | Biolegend | 353234 | | CD11a | PE-Cy7 | 5 | BD Biosciences | 561387 | | CD11b | BV785 | 5 | Biolegend | 101243 | | CD14 | AF700 | 2 | BD Biosciences | 557923 | | CD14 | BUV737 | 1 | BD Biosciences | 612763 | | CD14 | BV395 | 4 | BD Biosciences | 563561 | | CD16 | BV786 | 2 | BD Biosciences | 563690 | | CD16 | PB | 2.5 | BD Biosciences | 558122 | | CD163 | PE | 5 | BD Biosciences | 560933 | | CD19 | PE-Cy7 | 2.5 | BD Biosciences | 560728 | | CD20 | PE-Cy7 | 4 | BD Biosciences | 560735 | | CD206 | FITC | 5 | Biolegend | 321104 | | CD3 | BUV395 | 2 | BD Biosciences | 563546 | | CD3 | PB | 2 | BD Biosciences | 558117 | | CD3 | APC-Cy7 | 1 | Biolegend | 317342 | | CD31 (PECAM1) | AF700 | 5 | R&D | FAB3567N | | CD4 | BV786 | 2 | BD Biosciences | 563877 | | CD4 | BUV496 | 3 | BD Biosciences | 612938 | | CD4 | BUV737 | 1 | BD Biosciences | 612748 | | CD45 | APC-H7 | 5 | BD Biosciences | 560178 | | CD45 | FITC | 5 | BD Biosciences | 555482 | | CD45RO | PerCP Cy5.5 | 2 | Biolegend | 304222 | | CD56 | BV605 | 2 | Biolegend | 318334 | | CD56 | BV650 | 4 | Biolegend | 362532 | | CD69 | APC | 2 | BD Biosciences | 555533 | | CD8 | BV650 | 2 | Biolegend | 301401 | | CD8 | PB | 2 | BD Biosciences | 558207 | | CD8 | BV711 | 2 | BD Biosciences | 563677 | | CD86 | BV650 | 1 | BD Biosciences | 563411 | | Claudin-5 | - | 1 | Invitrogen | 35-2500 | | Collagen IV | - | 1 | Millepore | AB8201 | | Gata-3 | AF488 | 5 | ThermoFisher Scientific / Invitrogen | 53-9966-42 | | GM-CSF | PerCP Cy5.5 | 2.5 | BD Biosciences | 562258 | | HLA-DR | AF700 | 2 | invitrogen | 56-9956-42 | | HLA-DR | BUV496 | 4 | BD Biosciences | 749866 | | ICAM (CD54) | APC | 5 | BD Biosciences | 559771 | | ICAM (CD54) | PE-Cy5 | 5 | BD Biosciences | 555512 | | IFNγ | AF700 | 0.2 | BD Biosciences | 557995 | | MMP2 | biotin | 1 | Invitrogen | MA5-14183 | | MMP28 | PE | 2.5 | Santa Cruz | sc-515010 PE | | MMP9 | PerCP | 2.5 | Stress Marq | SMC-396D-PCP | | MRC2 (UPARAP) | - | 2.5 | Abcam | Ab70132 | | MRC2 (CD280) | PE | 5 | BD Biosciences | 566817 | | RORγ(t) | PE | 1.25 | ThermoFisher Scientific / eBioscience | 12-6988-82 | | Streptavidin | BV605 | 1 | BD Biosciences | 563260 | | T-bet | eFluor 660 | 10 | ThermoFisher Scientific / Invitrogen | 50-5825-82 | | TIMP1 | AF350 | 5 | R&D Systems | IC970U-100ug | | TIMP2 | AF594 | 3 | Novusbio | NBP2-74521AF594 | | TNF | PE-Cy7 | 2.5 | BD Biosciences | 557647 | | UPAR (CD87) | APC | 5 | Invitrogen, eBioscience | 17-3879-42 | |
| --- | --- | --- | --- | --- | --- | --- | --- | --- | --- | --- | --- | --- | --- | --- | --- | --- | --- | --- | --- | --- | --- | --- | --- | --- | --- | --- | --- | --- | --- | --- | --- | --- | --- | --- | --- | --- | --- | --- | --- | --- | --- | --- | --- | --- | --- | --- | --- | --- | --- | --- | --- | --- | --- | --- | --- | --- | --- | --- | --- | --- | --- | --- | --- | --- | --- | --- | --- | --- | --- | --- | --- | --- | --- | --- | --- | --- | --- | --- | --- | --- | --- | --- | --- | --- | --- | --- | --- | --- | --- | --- | --- | --- | --- | --- | --- | --- | --- | --- | --- | --- | --- | --- | --- | --- | --- | --- | --- | --- | --- | --- | --- | --- | --- | --- | --- | --- | --- | --- | --- | --- | --- | --- | --- | --- | --- | --- | --- | --- | --- | --- | --- | --- | --- | --- | --- | --- | --- | --- | --- | --- | --- | --- | --- | --- | --- | --- | --- | --- | --- | --- | --- | --- | --- | --- | --- | --- | --- | --- | --- | --- | --- | --- | --- | --- | --- | --- | --- | --- | --- | --- | --- | --- | --- | --- | --- | --- | --- | --- | --- | --- | --- | --- | --- | --- | --- | --- | --- | --- | --- | --- | --- | --- | --- | --- | --- | --- | --- | --- | --- | --- | --- | --- | --- | --- | --- | --- | --- | --- | --- | --- | --- | --- | --- | --- | --- | --- | --- | --- | --- | --- | --- | --- | --- | --- | --- | --- | --- | --- | --- | --- | --- | --- | --- | --- | --- | --- | --- | --- | --- | --- | --- | --- | --- | --- | --- | --- | --- | --- | --- | --- | --- | --- | --- | --- | --- | --- | --- | --- | --- | --- | --- | --- | --- | --- | --- | --- | --- | --- | --- | --- | --- | --- | --- | --- | --- | --- | --- | --- | --- | --- | --- | --- | --- | --- | --- | --- | --- | --- | --- | --- | --- | --- | --- | --- | --- | --- | --- | --- | --- | --- | --- | --- | --- | --- | --- | --- | --- | --- | --- | --- | --- | --- | --- | --- | --- | --- | --- | --- | --- | --- | --- | --- | --- | --- | --- | --- | --- | --- | --- | --- | --- | --- | --- | --- | --- | --- | --- | --- | --- | --- |
|  |

**Table S2: Antibodies for flow cytometry – murine samples**

| | Target | Fluorophore | Dilution or µl per reaction | Company | Catalog number | | --- | --- | --- | --- | --- | | - | AF647 | 2 | BD Biosciences | 557731 | | - | AF700 | 3 | BD Biosciences | 558001 | | anti-goat | AF488 | 1 : 350 dilution | Jackson ImmunoResearch | 705-546-147 | | anti-mouse | AF488 | 1 : 250 dilution | Invitrogen | A21202 | | anti-rabbit | AF647 | 1:500 dilution | Jackson ImmunoResearch | 711-605-152 | | CD11b | BV785 | 5 | Biolegend | 101243 | | CD11b | BUV395 | 0.5 | BD Biosciences | 563553 | | CD19 | BV711 | 1 | BD Biosciences | 563157 | | CD3e | BV786 | 3 | BD Biosciences | 564379 | | CD4 | PE-Cy7 | 0.5 | BD Biosciences | 552775 | | CD45 | PerCPCy5.5 | 0.5 | BD Biosciences | 550994 | | CD8a | PB | 4 | BD Biosciences | 558106 | | IFNγ | AF700 | 3 | BD Biosciences | 557998 | | IL17 | AF647 | 2 | BD Biosciences | 560184 | | Ly6C | PE | 0.1 | BD Biosciences | 560592 | | MMP2 | biotin | 1 | Invitrogen | MA5-14183 | | MMP9 | - | 1 | Chemicon | AB19016 | | MRC2 | - | 2.5 | EMD Millepore | MAB2613 | | Streptavidin | BV605 | 1 | BD Biosciences | 563260 | | TIMP1 | - | 2.5 | Novus biologicals | AF980 | | TIMP2 | AF594 | 3 | Novusbio | NBP2-74521AF594 | |
| --- | --- | --- | --- | --- | --- | --- | --- | --- | --- | --- | --- | --- | --- | --- | --- | --- | --- | --- | --- | --- | --- | --- | --- | --- | --- | --- | --- | --- | --- | --- | --- | --- | --- | --- | --- | --- | --- | --- | --- | --- | --- | --- | --- | --- | --- | --- | --- | --- | --- | --- | --- | --- | --- | --- | --- | --- | --- | --- | --- | --- | --- | --- | --- | --- | --- | --- | --- | --- | --- | --- | --- | --- | --- | --- | --- | --- | --- | --- | --- | --- | --- | --- | --- | --- | --- | --- | --- | --- | --- | --- | --- | --- | --- | --- | --- | --- | --- | --- | --- | --- | --- | --- | --- | --- | --- | --- | --- | --- | --- | --- |

**Supplementary references**

34 Cayrol, R. et al. Activated leukocyte cell adhesion molecule promotes leukocyte trafficking into the central nervous system. Nature immunology 9, 137-145 (2008).

35 Stromnes, I. M., Cerretti, L. M., Liggitt, D., Harris, R. A. & Goverman, J. M. Differential regulation of central nervous system autoimmunity by TH1 and TH17 cells. Nature medicine 14, 337-342 (2008).

36 Ifergan, I. et al. Statins reduce human blood-brain barrier permeability and restrict leukocyte migration: relevance to multiple sclerosis. Annals of neurology 60, 45-55, doi:10.1002/ana.20875 (2006).

37 Kuhlmann, T. et al. An updated histological classification system for multiple sclerosis lesions. Acta neuropathologica 133, 13-24 (2017).

38 Thompson, A. J. et al. Diagnosis of multiple sclerosis: 2017 revisions of the McDonald criteria. The Lancet Neurology 17, 162-173, doi:https://doi.org/10.1016/S1474-4422(17)30470-2 (2018).

39 Michel, L. et al. Activated leukocyte cell adhesion molecule regulates B lymphocyte migration across central nervous system barriers. Science translational medicine 11, eaaw0475 (2019).

40 Stromnes, I. M. & Goverman, J. M. Active induction of experimental allergic encephalomyelitis. Nature protocols 1, 1810-1819 (2006).

41 Calabria, A. R., Weidenfeller, C., Jones, A. R., De Vries, H. E. & Shusta, E. V. Puromycin‐purified rat brain microvascular endothelial cell cultures exhibit improved barrier properties in response to glucocorticoid induction. Journal of neurochemistry 97, 922-933 (2006).

42 Matsushita, T. et al. Mesenchymal stem cells transmigrate across brain microvascular endothelial cell monolayers through transiently formed inter-endothelial gaps. Neuroscience letters 502, 41-45 (2011).

43 Broux, B. et al. Interleukin-26, preferentially produced by TH17 lymphocytes, regulates CNS barrier function. Neurology-Neuroimmunology Neuroinflammation 7 (2020).

44 Charabati, M. et al. MCAM+ brain endothelial cells contribute to neuroinflammation by recruiting pathogenic CD4+ T lymphocytes. Brain 146, 1483-1495, doi:10.1093/brain/awac389 (2023).

45 Livak, K. J. & Schmittgen, T. D. Analysis of relative gene expression data using real-time quantitative PCR and the 2− ΔΔCT method. Methods 25, 402-408 (2001).

46 Schmittgen, T. D. & Livak, K. J. Analyzing real-time PCR data by the comparative CT method. Nature protocols 3, 1101-1108 (2008).

47 Haqqani, A. S., Kelly, J. F. & Stanimirovic, D. B. Quantitative protein profiling by mass spectrometry using label-free proteomics. Genomics Protocols, 241-256 (2008).

48 Podjaski, C. et al. Netrin 1 regulates blood–brain barrier function and neuroinflammation. Brain 138, 1598-1612, doi:10.1093/brain/awv092 (2015).

49 Lécuyer, M.-A. et al. Dual role of ALCAM in neuroinflammation and blood–brain barrier homeostasis. Proceedings of the National Academy of Sciences 114, E524 LP-E533, doi:10.1073/pnas.1614336114 (2017).

50 Madsen, D. H. et al. The non-phagocytic route of collagen uptake: A distinct degradation pathway. Journal of Biological Chemistry 286, 26996-27010, doi:10.1074/JBC.M110.208033/ATTACHMENT/CC528A92-0FF2-4AE8-81EB-12805B543F3F/MMC1.PDF (2011).

51 Engelholm, L. H. et al. Targeting a novel bone degradation pathway in primary bone cancer by inactivation of the collagen receptor uPARAP/Endo180. The Journal of pathology 238, 120-133 (2016).
